# Supplementary material
Source: MDPI journal article supplement (https://www.mdpi.com/search?q=sports-04-00026)
Supplement: s001 [file sports-04-00026-s001.pdf]

## Supplementary Materials

# The Effects of a Multi-Ingredient Performance Supplement on Hormonal Profiles and Body Composition in Male College Athletes

Matthew H. Sharp <sup>1,\*</sup>, Kevin A. Shields <sup>2,†</sup>, Jacob T. Rauch <sup>2,†</sup>, Ryan P. Lowery <sup>1,†</sup>, Shane E. Durkee <sup>3,†</sup>, Gabriel J. Wilson <sup>3,†</sup> and Eduardo O. De Souza <sup>2,†</sup>

**Table S1.** MIPS Proprietary Blend.

| 1709 mg Per Serving <sup>+</sup>                                                                                                                                                                                                                                                                                                                                                                                                                                                                                                                                                                                                                                                                                                                                                              |  |
|-----------------------------------------------------------------------------------------------------------------------------------------------------------------------------------------------------------------------------------------------------------------------------------------------------------------------------------------------------------------------------------------------------------------------------------------------------------------------------------------------------------------------------------------------------------------------------------------------------------------------------------------------------------------------------------------------------------------------------------------------------------------------------------------------|--|
| TRIBULUS EXTRAT (WHOLE PLANT) ( <i>Tribulu terrestris</i> ) (15% protodioscin), FENUGREEK EXTRACT ( <i>Trigonella foenum-graecum</i> ) (4:1 EXT), FLAXSEED POWDER ( <i>Linum usitatissimum</i> ), CHRYSIN, KUDZU EXTRACT (ROOT) ( <i>Pueraria lobata</i> ), RED CLOVER EXTRACT (ARIAL PARTS) ( <i>Trifolium pratense</i> ), ZINC SULFATE MONOHYDRATE, LONGJACK EXTRACT (ROOT) ( <i>Eurycoma longifolia jack</i> ), GLYCINE, L-ARGININE HCL, MAGNESIUM OXIDE, DI INDOLYL METHANE, L-METHIONINE, COPPER GLUCONATE, CORDYCEPS EXTRACT (WHOLE PLANT) ( <i>Cordyceps sinensis</i> ), MIXED PLANT PHYTOSTEROLS, NETTLE EXTRACT (LEAF) ( <i>Urtica dioica</i> ), OAT STRAW EXTRACT (AERIAL PARTS) ( <i>Avena sativa L</i> ), SAW PALMETTO EXTRACT (FRUIT), ( <i>Serenoa repens</i> ), BIOPERIN, NADH |  |

<sup>+</sup> Subjects took two servings of the MIPS proprietary blend daily.

**Table S2.** Whole Blood Clinical Chemistry Markers.

| Variable                 | Placebo        |                | MIPS           |                | G x T <i>p</i> -Value |
|--------------------------|----------------|----------------|----------------|----------------|-----------------------|
|                          | Pre            | Post           | Pre            | Post           |                       |
| WBC (K/ $\mu$ L)         | 5.9 $\pm$ 1.2  | 6.1 $\pm$ 1.0  | 5.7 $\pm$ 0.7  | 5.5 $\pm$ 0.5  | 0.106                 |
| RBC (M/ $\mu$ L)         | 4.6 $\pm$ 0.9  | 5.0 $\pm$ 0.5  | 4.9 $\pm$ 0.1  | 4.8 $\pm$ 0.1  | 0.245                 |
| Hemoglobin (g/dL)        | 15.5 $\pm$ 1.1 | 15.7 $\pm$ 1.1 | 14.6 $\pm$ 0.5 | 14.7 $\pm$ 0.4 | 0.639                 |
| Hematocrit (%)           | 45.2 $\pm$ 3.6 | 45.2 $\pm$ 3.1 | 43.4 $\pm$ 1.0 | 43.7 $\pm$ 1.7 | 0.878                 |
| MVC (fL)                 | 91 $\pm$ 5     | 89 $\pm$ 5     | 89 $\pm$ 3     | 90 $\pm$ 4     | 0.061                 |
| MCH (pg)                 | 31.0 $\pm$ 1.4 | 30.4 $\pm$ 1.7 | 30.8 $\pm$ 1.2 | 30.5 $\pm$ 1.2 | 0.557                 |
| MCHC (g/dL)              | 33.9 $\pm$ 0.7 | 34.3 $\pm$ 0.9 | 33.3 $\pm$ 0.9 | 33.4 $\pm$ 0.9 | 0.523                 |
| Neutrophils (K/ $\mu$ L) | 2.9 $\pm$ 1.2  | 3.5 $\pm$ 1.6  | 3.2 $\pm$ 0.5  | 3.0 $\pm$ 0.4  | 0.078                 |
| Lymphocytes (K/ $\mu$ L) | 2.3 $\pm$ 0.2  | 2.1 $\pm$ 0.4  | 2.0 $\pm$ 0.3  | 1.9 $\pm$ 0.4  | 0.617                 |
| Monocytes (K/ $\mu$ L)   | 0.6 $\pm$ 0.1  | 0.5 $\pm$ 0.1  | 0.5 $\pm$ 0.1  | 0.5 $\pm$ 0.1  | 0.850                 |
| Eosmophils (K/ $\mu$ L)  | 0.2 $\pm$ 0.1  | 0.2 $\pm$ 0.1  | 0.2 $\pm$ 0.1  | 0.2 $\pm$ 0.1  | 0.777                 |
| Basophils (K/ $\mu$ L)   | 0.1 $\pm$ 0.1  | 0.1 $\pm$ 0.1  | 0.1 $\pm$ 0.1  | 0.1 $\pm$ 0.1  | 0.584                 |

Values are reported as mean  $\pm$  standard deviation. WBC = white blood cells; RBC = red blood cells; MVC = mean cell volume; MCH = mean cell hemoglobin; MCHC = mean cell hemoglobin concentration.

**Table S3.** Serum Clinical Chemistry Markers.

| Variable                | Placebo       |               | MIPS           |                | G x T <i>p</i> -Value |
|-------------------------|---------------|---------------|----------------|----------------|-----------------------|
|                         | Pre           | Post          | Pre            | Post           |                       |
| Glucose (mg/dL)         | 89 $\pm$ 5    | 89 $\pm$ 5    | 84 $\pm$ 4     | 84 $\pm$ 5     | 0.296                 |
| BUN (mg/dL)             | 19 $\pm$ 4    | 20 $\pm$ 5    | 19 $\pm$ 3     | 20 $\pm$ 4     | 0.140                 |
| Creatinine (mg/dL)      | 1.1 $\pm$ 0.1 | 1.1 $\pm$ 0.1 | 1.04 $\pm$ 0.1 | 1.04 $\pm$ 0.1 | 0.528                 |
| Total Protein (g/dL)    | 6.8 $\pm$ 0.2 | 6.8 $\pm$ 0.2 | 7.2 $\pm$ 0.7  | 7.1 $\pm$ 0.6  | 0.398                 |
| Albumin (g/dL)          | 4.6 $\pm$ 0.2 | 4.6 $\pm$ 0.3 | 4.6 $\pm$ 0.38 | 4.6 $\pm$ 0.2  | 0.893                 |
| Total Bilirubin (mg/dL) | 0.4 $\pm$ 0.1 | 0.3 $\pm$ 0.1 | 0.6 $\pm$ 0.3  | 0.5 $\pm$ 0.3  | 0.999                 |
| Sodium (mmol/L)         | 142 $\pm$ 2   | 142 $\pm$ 2   | 140 $\pm$ 2    | 140 $\pm$ 2    | 0.999                 |
| Potassium (mmol/L)      | 4.4 $\pm$ 0.2 | 4.5 $\pm$ 0.4 | 4.1 $\pm$ 0.1  | 4.1 $\pm$ 0.2  | 0.521                 |

|                          |         |         |         |         |       |
|--------------------------|---------|---------|---------|---------|-------|
| Chloride (mmol/L)        | 102 ± 1 | 102 ± 1 | 100 ± 1 | 101 ± 1 | 0.838 |
| CO <sub>2</sub> (mmol/L) | 24 ± 1  | 24 ± 2  | 25 ± 1  | 25 ± 1  | 0.697 |
| ALP (IU/L)               | 88 ± 25 | 84 ± 24 | 85 ± 14 | 83 ± 18 | 0.094 |
| AST (IU/L)               | 29 ± 5  | 30 ± 6  | 26 ± 3  | 26 ± 3  | 0.357 |
| ALT (IU/L)               | 22 ± 3  | 22 ± 3  | 25 ± 4  | 26 ± 4  | 0.432 |

Values are reported as mean ± standard deviation. HDL = high density lipoprotein; LDL = low density lipoprotein; BUN = blood urea nitrogen; CO<sub>2</sub> = carbon dioxide; ALP = Alkaline phosphatase; AST = aspartate aminotransferase; ALT = alanine transaminase.

**Table S4.** Urine Clinical Markers.

| Variable             | Placebo       |               | MIPS          |               | G x T <i>p</i> -Value |
|----------------------|---------------|---------------|---------------|---------------|-----------------------|
|                      | Pre           | Post          | Pre           | Post          |                       |
| Glucose              | 0.0 ± 0.0     | 0.0 ± 0.0     | 0.0 ± 0.0     | 0.0 ± 0.0     | 0.999                 |
| Ketones              | 0.0 ± 0.0     | 0.0 ± 0.0     | 0.0 ± 0.0     | 0.0 ± 0.0     | 0.999                 |
| Occult Blood         | 0.0 ± 0.0     | 0.0 ± 0.0     | 0.0 ± 0.0     | 0.0 ± 0.0     | 0.999                 |
| Protein              | 0.0 ± 0.0     | 0.0 ± 0.0     | 0.0 ± 0.0     | 0.0 ± 0.0     | 0.999                 |
| Nitrite              | 0.0 ± 0.0     | 0.0 ± 0.0     | 0.0 ± 0.0     | 0.0 ± 0.0     | 0.999                 |
| Bilirubin            | 0.0 ± 0.0     | 0.0 ± 0.0     | 0.0 ± 0.0     | 0.0 ± 0.0     | 0.999                 |
| Urobilinogen (mg/dL) | 0.3 ± 0.2     | 0.3 ± 0.2     | 0.3 ± 0.3     | 0.3 ± 0.2     | 0.196                 |
| pH                   | 6.0 ± 0.4     | 6.2 ± 0.3     | 6.2 ± 0.2     | 6.1 ± 0.2     | 0.098                 |
| Specific Gravity     | 1.025 ± 0.008 | 1.027 ± 0.004 | 1.019 ± 0.007 | 1.019 ± 0.009 | 0.484                 |

Values are reported as mean ± standard deviation. Zeros indicate a lack of detectable variable in urine.
